# Supplementary material for: Improvement of bias stability of oxyanion-incorporated aqueous sol–gel processed indium zinc oxide TFTs
Source: Royal Society of Chemistry journal article supplement (doi:10.1039/c4tc00667d), 2014-06-30
Supplement: c4tc00667d1.pdf [file c4tc00667d1.pdf]

(Supporting Information)

# **Bias Stability Improvement of Oxyanion Incorporated Aqueous Sol-gel Processed Indium Zinc Oxide TFT**

Hyungjin Park<sup>†</sup>, Yun-Yong Nam<sup>†</sup>, Jungho Jin and Byeong-Soo Bae\*

Laboratory of Optical Materials and Coating (LOMC), Department of Materials Science and Engineering, Korea Advanced Institute of Science and Technology (KAIST), Daejeon 305-701, Korea

\*corresponding author. E-mail address: [bsbae@kaist.ac.kr](mailto:bsbae@kaist.ac.kr)

<sup>†</sup> Both authors contributed equally to this work.

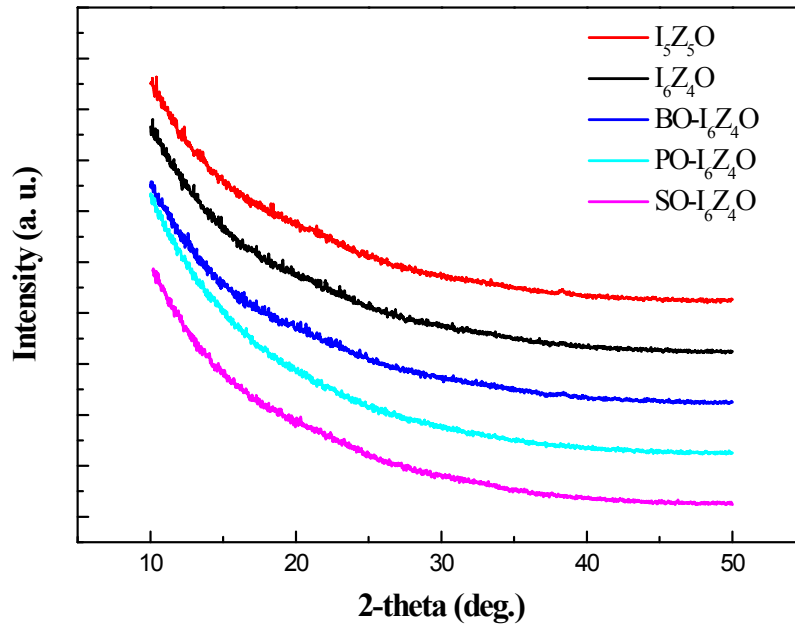

**Figure S1** XRD patterns of IZO and inorganic incorporated IZO thin films. The power of X-ray source was 40 kV and 300 mA and the patterns were obtained using 2-theta scan ( $\theta=2^\circ$ , scan speed= $2^\circ/\text{min}$ ).

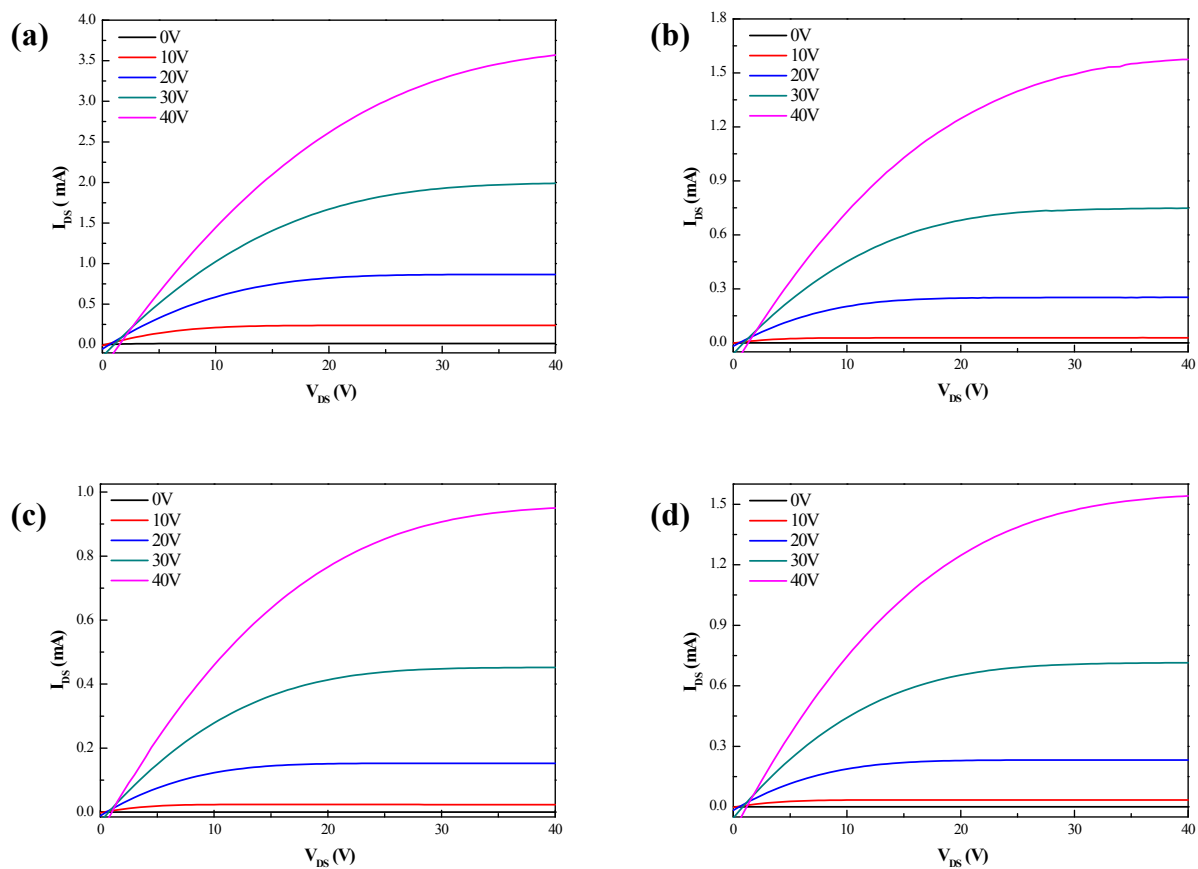

**Figure S2** Output curves of (a)  $I_6Z_4O$  (b) SO-, (c) PO-, and (d) BO- $I_6Z_4O$  TFTs as a function of applied gate bias ( $V_G = 0, 10, 20, 30$  and  $40$  V). All the output curve characteristics show the saturation behavior and incorporation of oxygen anion result in decrease of overall current level.

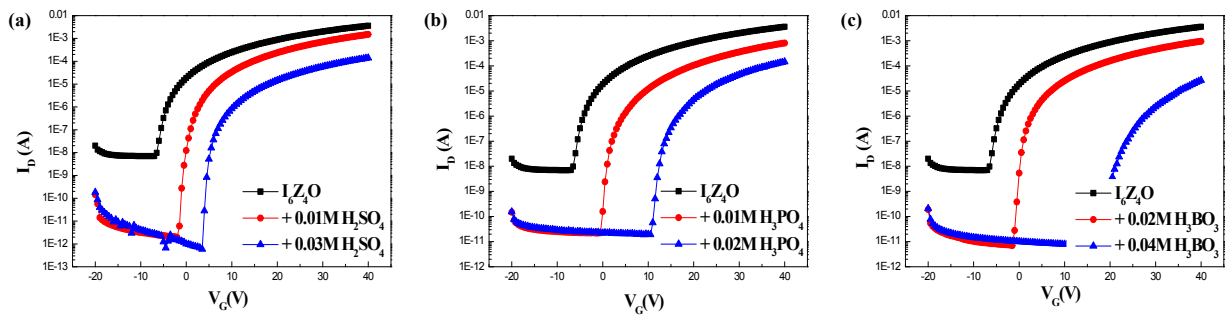

**Figure S3** Transfer characteristics of (a) sulfuric, (b) phosphoric and (c) boric acid incorporated indium zinc oxide TFT according to the various composition.

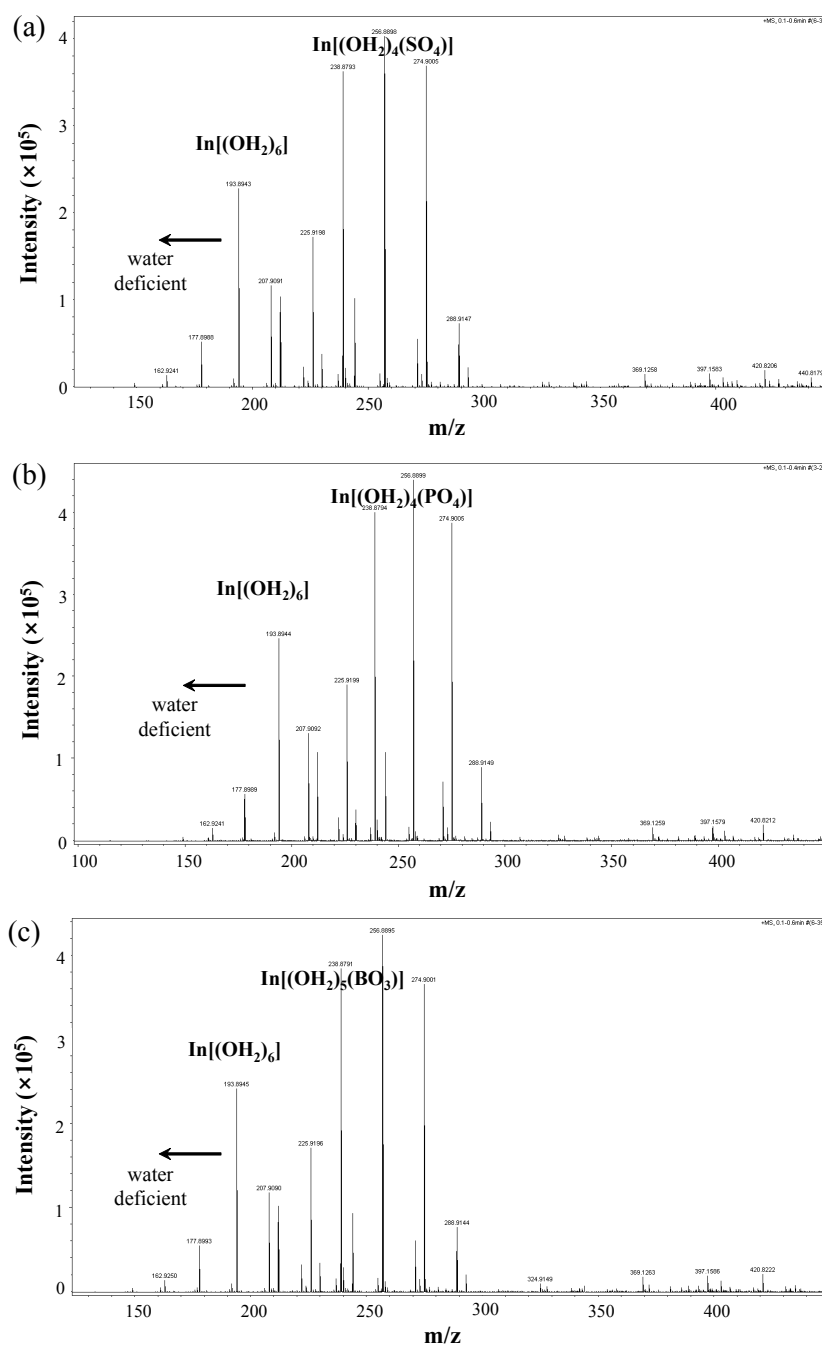

**Figure S4** HR-MS (high-resolution mass spectrometry; electrospray ionization) analyses of (a) sulfuric acid (b) phosphoric acid and (c) boric acid incorporated aqueous indium nitrate solution. Hwang et al. reported that a hexa-aquo indium complex ( $[\text{In}(\text{OH}_2)_6]$ ) is formed in aqueous indium nitrate solution.<sup>9</sup> Variation in the number of surrounding aquo ligands of the complex results in an interval of 18  $m/z$  identical to molecular weight of aquo ligand.<sup>12</sup> Incorporation of sulfate ( $\text{SO}_4^{2-}$ ,  $M_w=96$ ), phosphate ( $\text{PO}_4^{3-}$ ,  $M_w=94$ ) and borate ( $\text{BO}_3^{3-}$ ,  $M_w=58$ ) replaces some of aquo ligands and heavier molecular species are observed.

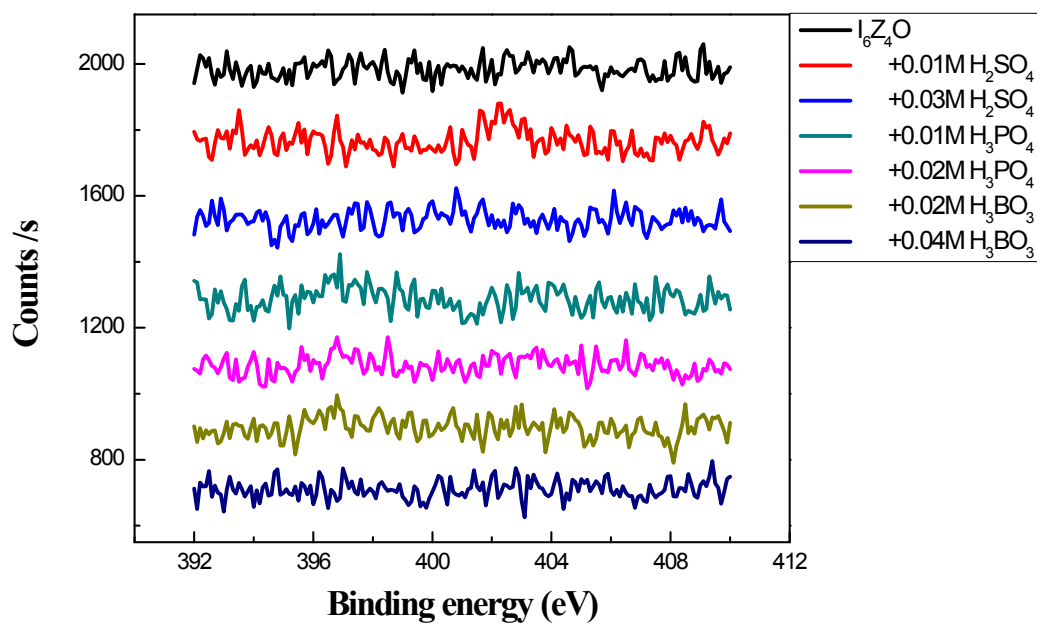

**Figure S5** XPS N 1s spectra of oxyanion incorporated  $I_6Z_4O$  thin films. All the thin films are nitrogen-free after thermal annealing.

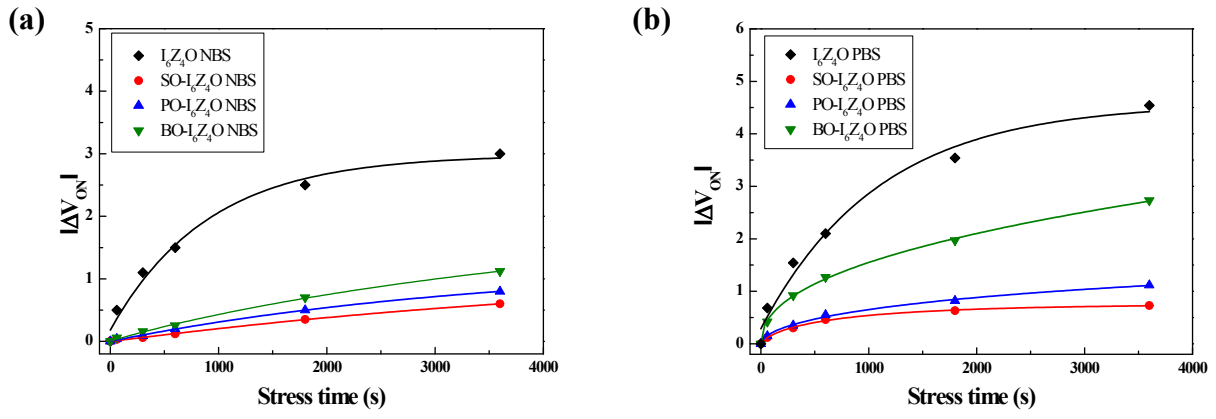

**Figure S6**  $V_{ON}$  shift under (a) NBS and (b) PBS conditions fitted with stretched exponential equation.

| Precursor composition                                |                                                      |                                |                                |                                | Atomic ratio |        |       |        |        |
|------------------------------------------------------|------------------------------------------------------|--------------------------------|--------------------------------|--------------------------------|--------------|--------|-------|--------|--------|
| In(NO <sub>3</sub> ) <sub>3</sub> ·xH <sub>2</sub> O | Zn(NO <sub>3</sub> ) <sub>2</sub> ·xH <sub>2</sub> O | H <sub>2</sub> SO <sub>4</sub> | H <sub>3</sub> PO <sub>4</sub> | H <sub>3</sub> BO <sub>3</sub> | In           | Zn     | S     | P      | B      |
| 0.12 M                                               | 0.08 M                                               | -                              | -                              | -                              | 62.9 %       | 37.1 % | -     | -      | -      |
| 0.12 M                                               | 0.08 M                                               | 0.01M                          | -                              | -                              | 61.3 %       | 33.1 % | 5.6 % | -      | -      |
| 0.12 M                                               | 0.08 M                                               | 0.03M                          | -                              | -                              | 56.4 %       | 34.1 % | 9.5 % | -      | -      |
| 0.12 M                                               | 0.08 M                                               | -                              | 0.01M                          | -                              | 58.0 %       | 37.8 % | -     | 4.2 %  | -      |
| 0.12 M                                               | 0.08 M                                               | -                              | 0.02M                          | -                              | 56.3 %       | 33.4 % | -     | 10.3 % | -      |
| 0.12 M                                               | 0.08 M                                               | -                              | -                              | 0.02M                          | 52.7 %       | 37.2 % | -     | -      | 10.0 % |
| 0.12 M                                               | 0.08 M                                               | -                              | -                              | 0.04M                          | 51.1 %       | 29.3 % | -     | -      | 19.6 % |

**Table S1.** The chemical composition of precursor solutions and the atomic ratio of resulting films calculated from XPS analysis.
